# Supplementary material
Source: MDPI journal article supplement (https://www.mdpi.com/2073-4395/10/5/642)

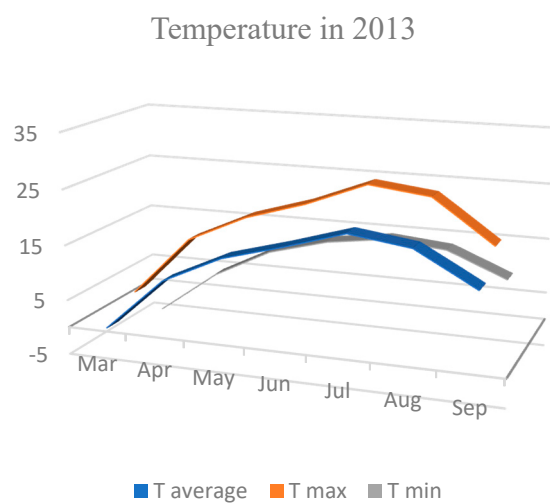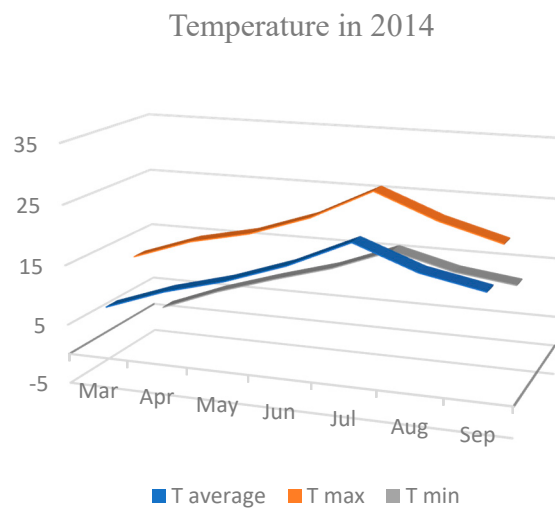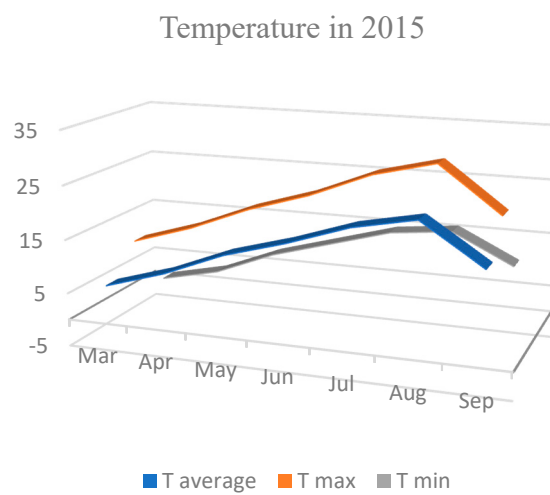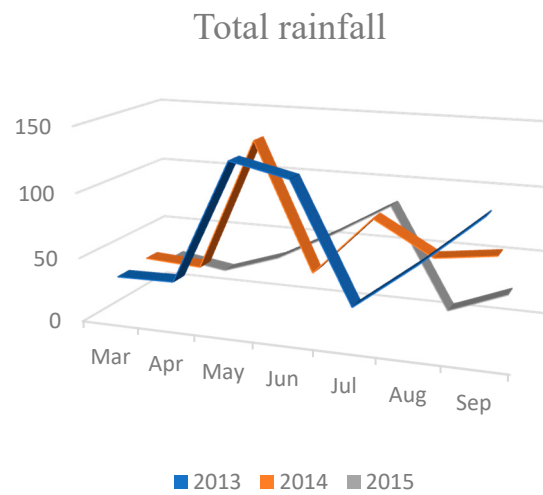

Figure S1. Climate graphs characterizing weather conditions in Swojec.

Supplement: s1 [file s1]
